# Supplementary material
Source: Springer Nature journal article supplement (https://www.springermedizin.de/resource/supplementary/13102_2008_10_MOESM2_ESM.pdf/9667538)

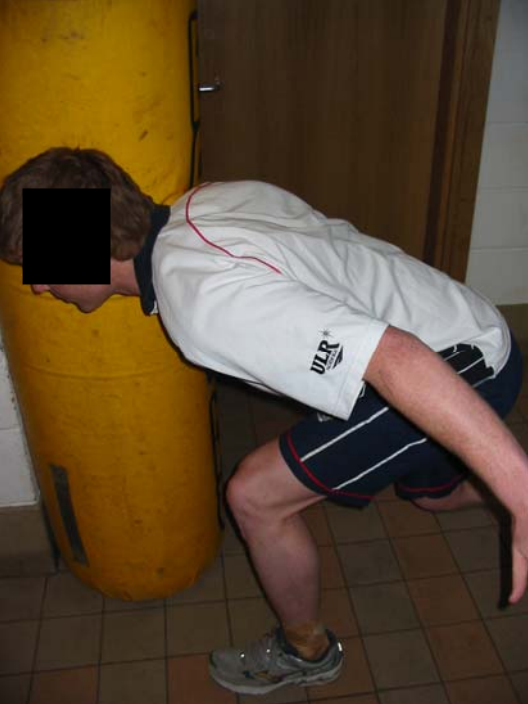

Supplement: MOESM2 [file 9667538]
